# Supplementary material for: New Gall-Forming Insect Model, Smicronyx madaranus: Critical Stages for Gall Formation, Phylogeny, and Effectiveness of Gene Functional Analysis
Source: MDPI journal article supplement (doi:10.3390/insects15010063), 2024-01-16
Supplement: s1 [file s1]

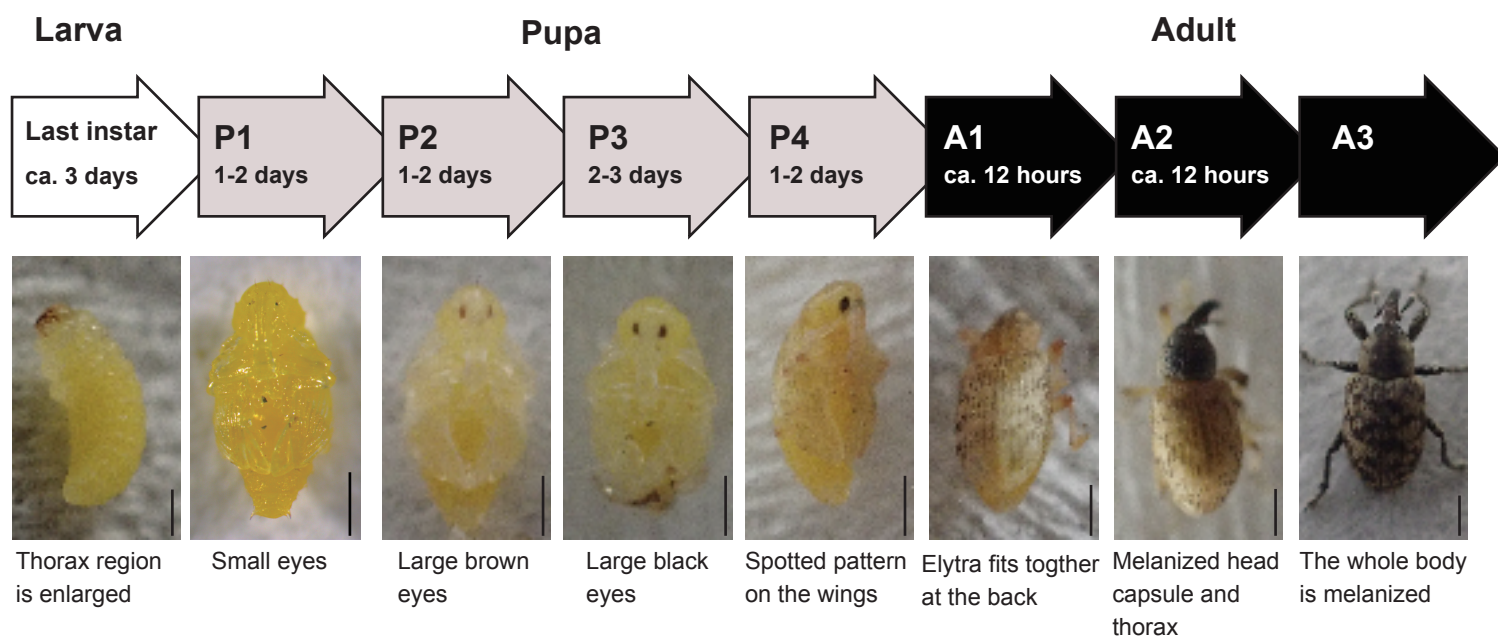

**Figure S4.** Growth stage and body color change in *S. madaranus*. Numbers of days on the arrow indicate the approximate durations under laboratory conditions. Bars, 1 mm.
