# Supplementary material for: New Gall-Forming Insect Model, Smicronyx madaranus: Critical Stages for Gall Formation, Phylogeny, and Effectiveness of Gene Functional Analysis
Source: MDPI journal article supplement (doi:10.3390/insects15010063), 2024-01-16
Supplement: s1 [file s1]

**Table S2** Primers used in this study

| Target gene                              | Primer name    | Direction | Sequence(5'→3') <sup>a</sup>                                | Product size (bp) | PCR T <sub>m</sub> (°C) | References |
|------------------------------------------|----------------|-----------|-------------------------------------------------------------|-------------------|-------------------------|------------|
| <b>Primers for phylogenetic analysis</b> |                |           |                                                             |                   |                         |            |
| <i>Cytochrome c oxidase subunit I</i>    | LCO1490        | Forward   | GGTCAACAAATCATAAAGATATTGG                                   | 710               | 50                      | 62         |
|                                          | HCO2198        | Reverse   | TAAACTTCAGGGTGACCAAAAAATCA                                  |                   |                         | 62         |
| <b>Primers for quantitative PCR</b>      |                |           |                                                             |                   |                         |            |
| <i>SmMCO2A</i> and <i>SmMCO2B</i>        | SmMCO2_q803F   | Forward   | ACCATTTCATTGGCACGGTAT                                       | 204               | 62                      | This study |
|                                          | SmMCO2_q1006R  | Reverse   | GGGCGGTTGTCTAACTACGA                                        |                   |                         | This study |
| <i>Elongation factor 1 alpha</i>         | WevEF1a_640F   | Forward   | AACATGTTGGAACCCTCCAC                                        | 175               | 62                      | This study |
|                                          | WevEF1a_814R   | Reverse   | CACCAATTTGTAGACATCCTG                                       |                   |                         | This study |
| <b>Primers for dsRNA</b>                 |                |           |                                                             |                   |                         |            |
| <i>SmMCO2A</i> and <i>SmMCO2B</i>        | T7_SmMCO2_276F | Forward   | GATCACT <u>TAATACGACTCACTATAGGG</u><br>TTTTCGAACGTCACCCACTG | 593               | 62                      | This study |
|                                          | T7_SmMCO2_810R | Reverse   | GATCACT <u>TAATACGACTCACTATAGGG</u><br>GGGCGGTTGTCTAACTACGA |                   |                         | This study |
| <i>EGFP</i>                              | T7_EGFP_284F   | Forward   | GATCACT <u>TAATACGACTCACTATAGGG</u><br>AGGAGCGCACCATCTTCTC  | 449               | 62                      | This study |
|                                          | T7_EGFP_674R   | Reverse   | GATCACT <u>TAATACGACTCACTATAGGG</u><br>ACGAACTCCAGCAGGACCAT |                   |                         | This study |

<sup>a</sup> The T7 promoter sequences are underlined.
