# Supplementary material for: New Gall-Forming Insect Model, Smicronyx madaranus: Critical Stages for Gall Formation, Phylogeny, and Effectiveness of Gene Functional Analysis
Source: MDPI journal article supplement (doi:10.3390/insects15010063), 2024-01-16
Supplement: s1 [file s1]

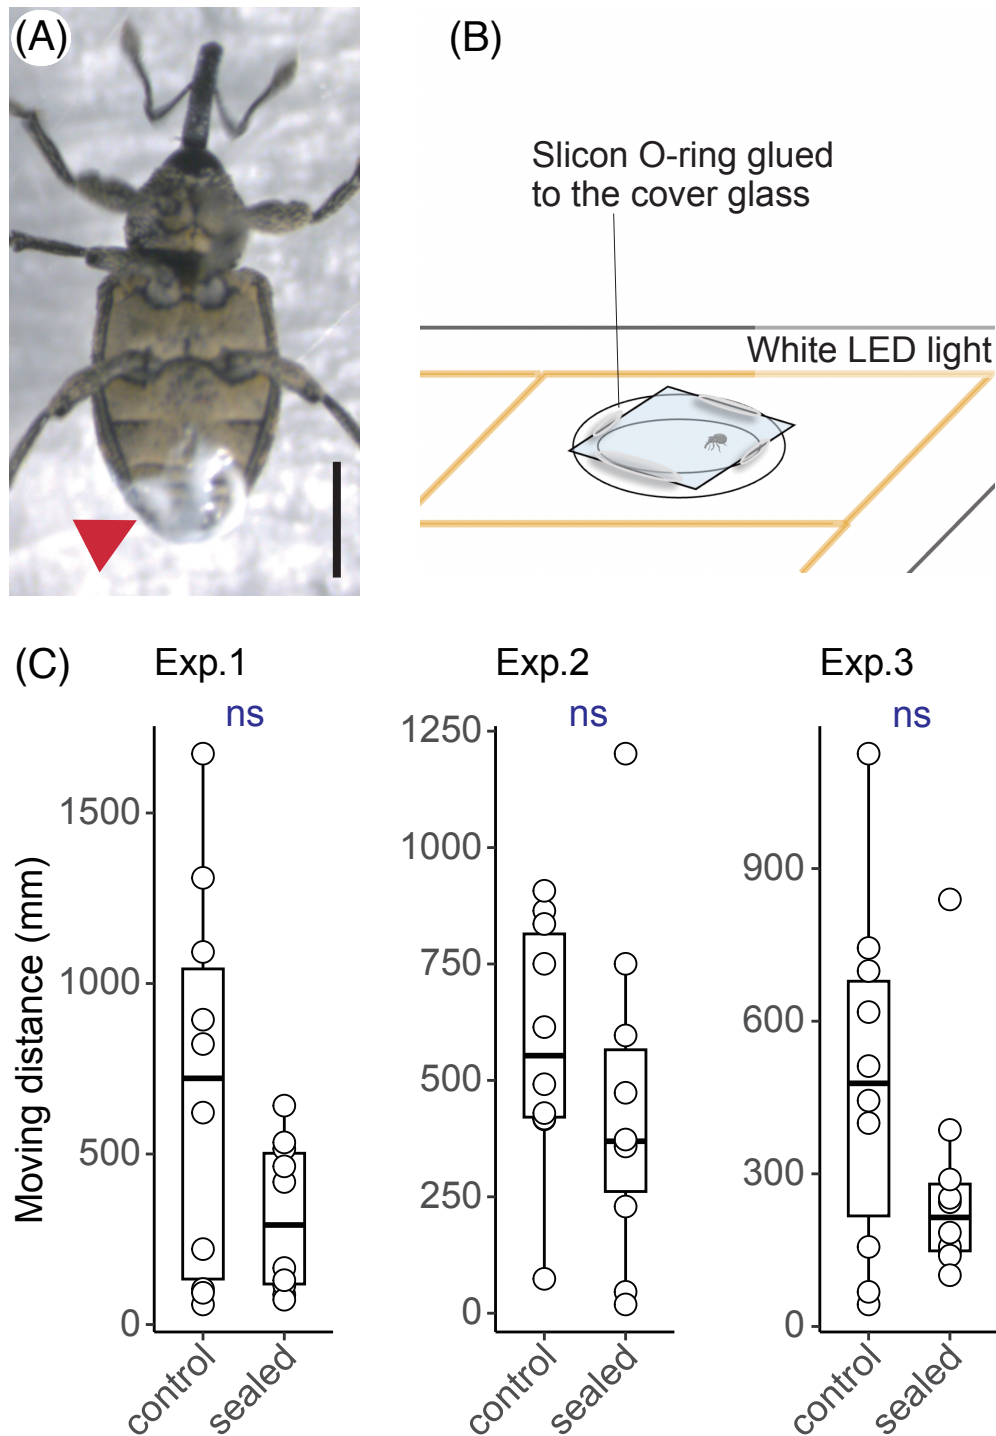

**Figure S1.** Effects of sealed ovipositors on behavioral activity. (A) Adult female with ovipositor sealed by white nail polish (arrowhead). Bar, 1 mm. (B) Illustration of a container for observing locomotor activity on a white LED light. (C) Behavioral activity recorded in three experiments (Exp.1–3). Box plot represents the distribution of the moving distance of control and sealed-ovipositor groups. Each open circle indicates the value of one female. ns indicates no significant difference (Wilcoxon rank sum test).
